# MIND TO MIND

Creative writing that explores the abstract side of our profession and our lives

Stephen T. Harvey, M.D., Editor

## Boring Holes

Sarah Simon

*how far will we go away from ourselves  
to reach into them?*

1 if you ever let the logic recess,  
yes, go on recess,  
go back, slack—  
imagine  
the orbitofrontal cortex  
smashed, pushed  
back, down,  
sound of slouch-  
ing,  
its roof the seat of a slide  
down  
from the midbrain.  
when you let it get too  
emotional illogical obsessive compulsive  
borderline—  
say, “it’s mine!”  
you can

This poem is one of the finalists of ANESTHESIOLOGY’s 2019 annual creative writing competition, The Letheon. sesimon8@gmail.com.

Accepted for publication February 5, 2020. Published online first on February 27, 2020.

Permission to reprint granted to the American Society of Anesthesiologists, Inc. by copyright author/owner. Anesthesiology 2020; 133:936–7. DOI: 10.1097/ALN.0000000000003226

whisper, whimper,  
 lull  
 your sweet way into your  
 sweet, sweet  
 skull—  
 not to sit down but to  
 stretch it out,  
 stretch out the seat,  
 pull it back to form—  
 the even-handed, manageable and managing setter  
 of norms,  
 the decor  
 -um.  
 imagine mangling your brain back to decorum.  
 like bread dough.  
 on a humid day.  
 (just add more flour.)  
 for something so abstract,  
 all it takes is a push, a pull, a  
 pill,  
 drill—  
 in. no, NO!  
 NO TREPHINATION (!!)  
 no trephination of  
 your base  
 and basin  
 for  
 love.  
 how far will we go away from ourselves  
 to reach into them  
 ?
